# The American Journal of Psychotherapy

APA's journal of psychotherapy practice and research

Since 1947, the *American Journal of Psychotherapy* has provided a forum for advancing the theory, science, and clinical practice of psychotherapy, publishing articles that expand understanding of psychotherapies, especially in the domains of efficacy, process, education, and practice. The journal provides authors and readers the opportunity to engage fully in pressing psychotherapy issues such as defining core elements of psychotherapies, dissemination of evidence-based practices, scaling best practices for expansion to larger populations, understanding mechanisms of change, and evaluating best practices for psychotherapy training and supervision. As part of APA Publishing's portfolio of journals, the *American Journal of Psychotherapy* is the ideal vehicle to disseminate knowledge about psychotherapy and send a message that psychotherapy remains firmly within the purview of psychiatry.

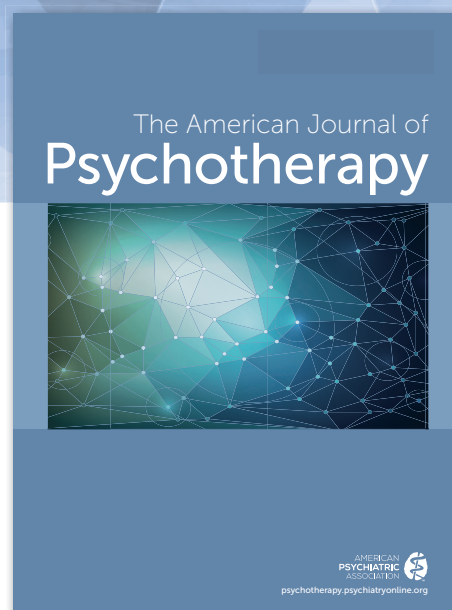

Holly A. Swartz, M.D., Editor-in-Chief

Frequency: Quarterly  
Online ISSN: 2575-6559  
[psychotherapy.psychiatryonline.org](http://psychotherapy.psychiatryonline.org)

Check out the most discussed and downloaded papers of those recently published:

- Connection During COVID-19: Pilot Study of a Telehealth Group Parenting Intervention
  - Developing a Structural Intervention for Outpatient Mental Health Care: Mapping Vulnerability and Privilege
  - “Know Thyself”: Supporting Personal Psychotherapy During Psychiatry Residency
- To receive updates on new content, follow the journal on  Twitter ([@APAPubJournals](https://twitter.com/APAPubJournals)) and sign up for free publication alerts at [psychiatryonline.org](http://psychiatryonline.org)
- **Visit our website** for more information about the journal and topic areas for which submissions are especially welcome.

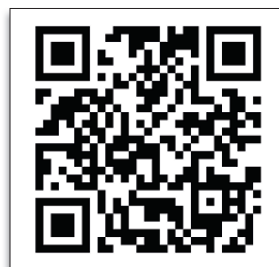

AMERICAN  
PSYCHIATRIC  
ASSOCIATION  
PUBLISHING

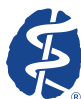

[appi.org](http://appi.org)  
1-800-368-5777  
[appi@psych.org](mailto:appi@psych.org)

[psychotherapy.psychiatryonline.org](http://psychotherapy.psychiatryonline.org)

AH2310A

# ▶ PODCASTS from APA Publishing

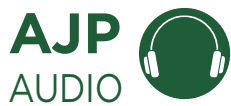

## AJP Audio

Host: Aaron Van Dorn, Online Content Manager

Each episode features an in-depth interview with an author from the most discussed article appearing in the latest issue of *The American Journal of Psychiatry*, along with Editor-in-Chief Ned Kalin highlighting the rest of the issue.

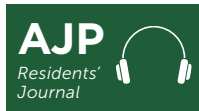

## The American Journal of Psychiatry Residents' Journal

Created by trainees for trainees and featuring interviews covering a wide array of topics, including career exploration, personal/professional journeys, clinical practice tips, and more.

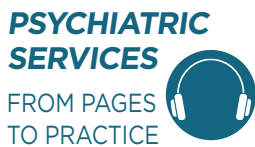

## Psychiatric Services From Pages to Practice

Hosts: Lisa Dixon, M.D., M.P.H., Editor, *Psychiatric Services*, and Josh Berezin, M.D., M.S.

Learn about the latest mental health services research published in *Psychiatric Services* and why it is relevant. Topics include community-based treatment programs, collaborative care, evidence-based treatment and service delivery, criminal and social justice, policy analysis, and more.

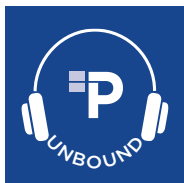

## Psychiatry Unbound

Host: Laura Roberts, M.D., M.A., Editor-in-Chief, APA Publishing Books

APA Publishing's Books podcast offers the opportunity to hear the voices behind the most prominent psychiatric scholarship in the field today. Learn about important topics in the field of psychiatry and see how our authors are making an impact in clinical settings throughout the world.

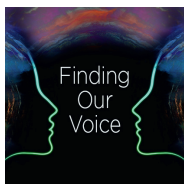

## Finding Our Voice

Host: Sanya Virani, M.B.B.S., M.P.H.

Finding Our Voice brings the viewpoints and opinions of the next generation of psychiatrists—including residents, fellows, and early career psychiatrists—to the forefront. Topics covered include systemic racism and social determinants.

Subscribe Today!

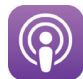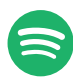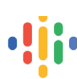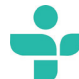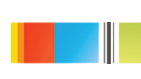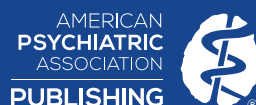

# Subscription and Business Information

*The American Journal of Psychiatry*, ISSN 0002-953X, is published monthly by the American Psychiatric Association.

The American Psychiatric Association does not hold itself responsible for statements made in its publications by contributors or advertisers. Unless so stated, material in *The American Journal of Psychiatry* does not reflect the endorsement, official attitude, or position of the American Psychiatric Association or of the Journal's Editorial Board.

Periodicals postage paid at Washington, DC, and additional mailing offices. POSTMASTER: Send address changes to *The American Journal of Psychiatry*, Circulation Department, American Psychiatric Association, 800 Maine Avenue, S.W., Suite 900, Washington, D.C. 20024.

## Editorial Office

*American Journal of Psychiatry*  
American Psychiatric Association  
800 Maine Avenue, S.W., Suite 900  
Washington, D.C. 20024  
E-mail: [ajp@psych.org](mailto:ajp@psych.org)

## Customer Service

Phone: (800) 368-5777 (toll-free)  
E-mail: [appi@psych.org](mailto:appi@psych.org)

## APA Member Subscription Services

Phone: (888) 35-PSYCH (toll-free)

## Subscriptions

Regular and resident-fellow members in the U.S. receive print and online access as a **member benefit**. Subscriptions for non-members start at \$378 per year. Online only subscriptions start at \$342 per year. Go to <https://www.appi.org/ajp> for more information.

Institutional subscriptions are tier priced. For institutional site license or pricing information, contact (202) 559-3729 or [institutions@psych.org](mailto:institutions@psych.org).

*Additional subscription options, including single issues and student rates*  
Contact Customer Service

## Advertising

*Pharmaceutical Print and Online Advertising*  
Frank Cox, Kathleen Harrison, Tim Wolfinger  
Pharmaceutical Media, Inc.  
30 East 33rd Street  
New York, NY 10016  
Phone: (212) 904-0379  
E-mail: [twolfinger@pminy.com](mailto:twolfinger@pminy.com)

*Nonpharmaceutical and Online Sales*  
Eamon Wood  
Pharmaceutical Media, Inc.  
E-mail: [ewood@pminy.com](mailto:ewood@pminy.com)  
(see address and phone above).

## Permissions and Reprints

Material published in the journals of the American Psychiatric Association and American Psychiatric Association Publishing is protected by copyright and all rights are reserved. Material may not be reproduced in any form or by any means without written permission from the copyright owner. For permission to reproduce material published by APA, please visit <http://www.appi.org/customer-service/permissions> for more information. Permission can also be secured through the Copyright Clearance Center ([www.copyright.com](http://www.copyright.com)).

APA does not require that permission be obtained for the photocopying of isolated articles for nonprofit classroom or library reserve use; all fees associated with such permission are waived. This consent does not extend to other kinds of copying, such as copying for general distribution, for advertising or promotional purposes, for creating new collective works, or for resale. Requests for commercial distribution and bulk reprints should be directed to (202) 609-7075.

Indexed in Abstracts for Social Workers, Academic Abstracts, Biological Abstracts, Chemical Abstracts, Chicago Psychoanalytic Literature Index, Cumulative Index to Nursing Literature, Excerpta Medica, Hospital Literature Index, Index Medicus, International Nursing Index, Nutrition Abstracts, Psychological Abstracts, Science Citation Index, Social Science Source, and Social Sciences Index.

Pages are produced by TNQ Technologies (Chennai, India) effective with Volume 179, Number 3, March 2022, and printed by Sheridan NH (Hanover, NH) on acid-free paper effective with Volume 169, Number 1, January 2012.

© 2024 American Psychiatric Association.

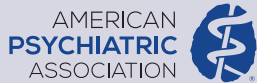

## ANNUAL MEETING ON DEMAND 2024

# Confronting Addiction from Prevention to Recovery

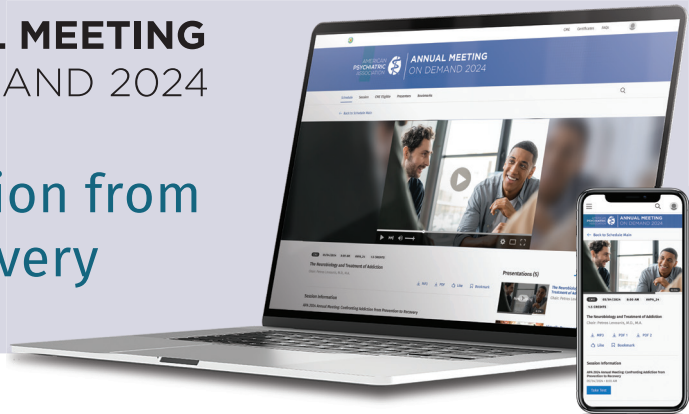

Access the latest peer-reviewed research, innovation, and ideas of today's most influential psychiatrists. Get access to On Demand meeting content in an easy-to-navigate on-line platform designed to save you time.

With On Demand, content is available anytime, anywhere, from any device, after the meeting is over, to keep you current with the latest in psychiatry.

### Access meeting content anytime, anywhere:

-  Find content quickly with advanced search
-  Earn CME credits for 2 years
-  Create playlists

### Meeting sessions include:

- Confronting addiction from prevention to recovery
- Review of clinical case studies
- Clinical practice tips and advancements in the field
- Latest peer reviewed research

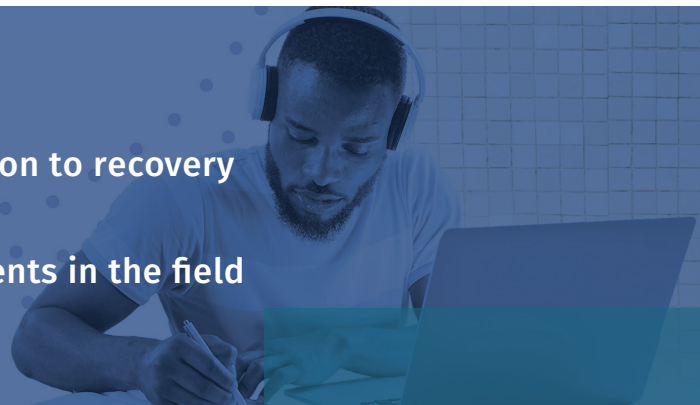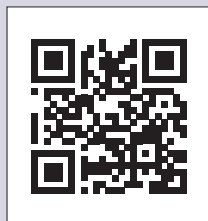

[APA.OnDemand.org](https://www.apa.org/ondemand)

Contact us:

800-501-2303

Monday–Friday 6am–5pm PT

\*The American Psychiatric Association (APA) is accredited by the Accreditation Council for Continuing Medical Education (ACCME) to provide Continuing Medical Education for physicians.

The APA designates the 2024 Annual Meeting On Demand Product for *AMA PRA Category 1 Credits™*. Physicians should claim only the credit commensurate with the extent of their participation in the activity.
