# The American Journal of Psychiatry

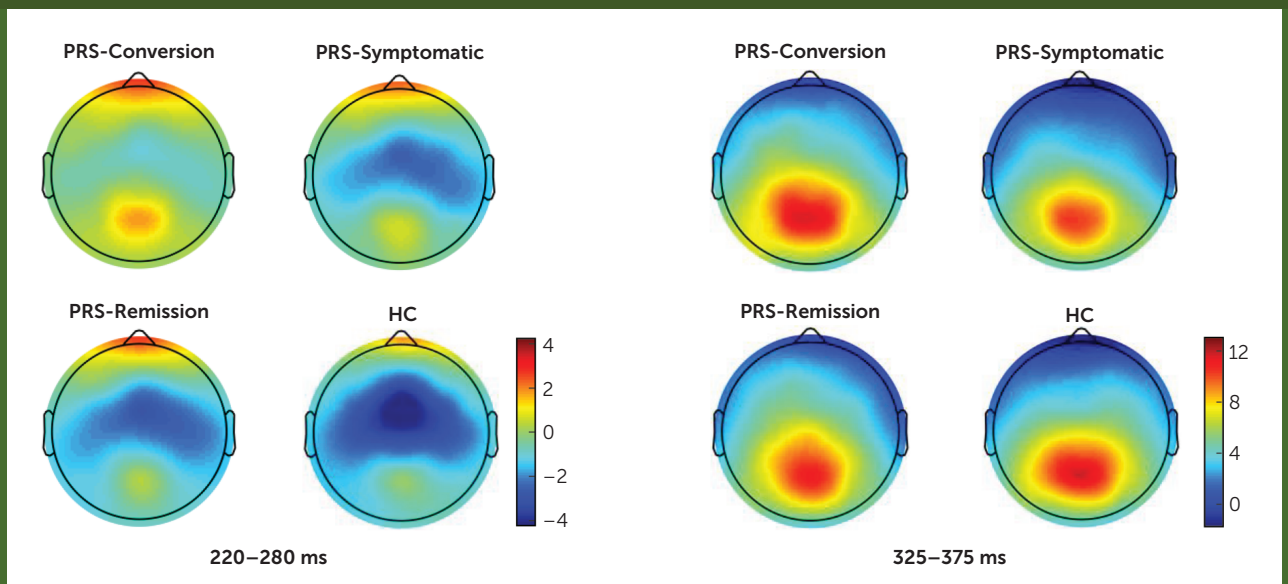

N2 Responses in Youths With Psychosis Risk Syndrome  
and Their Association With Clinical Outcomes

Irritability in Youths: A Critical Integrative Review

Neural Responses to Intranasal Oxytocin in Youths  
With Severe Irritability

Reciprocal Effects Between Negative Parenting  
and Children's Callous-Unemotional Traits  
From Mid to Late Childhood
